# Supplementary material for: Students’ preparedness for disasters in schools: a systematic review protocol
Source: HighWire-hosted journal article supplement (doi:10.1136/bmjpo-2020-000913), 2020-12-01
Supplement: bmjpo-2020-000913supp001_data_supplement.pdf [file bmjpo-2020-000913supp001_data_supplement.pdf]

## PRISMA-P 2015 Checklist

This checklist has been adapted for use with protocol submissions to *Systematic Reviews* from Table 3 in Moher D et al: Preferred reporting items for systematic review and meta-analysis protocols (PRISMA-P) 2015 statement. *Systematic Reviews* 2015 4:1

| Section/topic                                                                               | #  | Checklist item                                                                                                                                                                                  | Information reported                |                                     | Section where each item is addressed in the protocol |
|---------------------------------------------------------------------------------------------|----|-------------------------------------------------------------------------------------------------------------------------------------------------------------------------------------------------|-------------------------------------|-------------------------------------|------------------------------------------------------|
|                                                                                             |    |                                                                                                                                                                                                 | Yes                                 | No                                  |                                                      |
| <b>ADMINISTRATIVE INFORMATION</b>                                                           |    |                                                                                                                                                                                                 |                                     |                                     |                                                      |
| <b>Title: Students' Preparedness for Disasters in Schools: A Systematic Review Protocol</b> |    |                                                                                                                                                                                                 |                                     |                                     |                                                      |
| Identification                                                                              | 1a | Identify the report as a protocol of a systematic review                                                                                                                                        | <input checked="" type="checkbox"/> | <input type="checkbox"/>            | Title page                                           |
| <b>Registration</b>                                                                         | 2  | If registered, provide the name of the registry (e.g., PROSPERO) and registration number in the Abstract                                                                                        | <input checked="" type="checkbox"/> | <input type="checkbox"/>            | Title page                                           |
| <b>Authors</b>                                                                              |    |                                                                                                                                                                                                 |                                     |                                     |                                                      |
| Contact                                                                                     | 3a | Provide name, institutional affiliation, and e-mail address of all protocol authors; provide physical mailing address of corresponding author                                                   | <input checked="" type="checkbox"/> | <input type="checkbox"/>            | Title page                                           |
| Contributions                                                                               | 3b | Describe contributions of protocol authors and identify the guarantor of the review                                                                                                             | <input checked="" type="checkbox"/> | <input type="checkbox"/>            | Contributors                                         |
| <b>Amendments</b>                                                                           | 4  | If the protocol represents an amendment of a previously completed or published protocol, identify as such and list changes; otherwise, state plan for documenting important protocol amendments | <input type="checkbox"/>            | <input checked="" type="checkbox"/> | n/a                                                  |
| <b>Support</b>                                                                              |    |                                                                                                                                                                                                 |                                     |                                     |                                                      |
| Sources                                                                                     | 5a | Indicate sources of financial or other support for the review                                                                                                                                   | <input checked="" type="checkbox"/> | <input type="checkbox"/>            | Funding                                              |
| Sponsor                                                                                     | 5b | Provide name for the review funder and/or sponsor                                                                                                                                               | <input checked="" type="checkbox"/> | <input type="checkbox"/>            | Funding                                              |
| Role of sponsor/funder                                                                      | 5c | Describe roles of funder(s), sponsor(s), and/or institution(s), if any, in developing the protocol                                                                                              | <input checked="" type="checkbox"/> | <input type="checkbox"/>            | Funding                                              |
| <b>INTRODUCTION</b>                                                                         |    |                                                                                                                                                                                                 |                                     |                                     |                                                      |
| <b>Rationale</b>                                                                            | 6  | Describe the rationale for the review in the context of what is already known                                                                                                                   | <input checked="" type="checkbox"/> | <input type="checkbox"/>            | What is already known on this topic?                 |

| Section/topic                             | #   | Checklist item                                                                                                                                                                                                            | Information reported                |                          | Section where each item is addressed in the protocol |
|-------------------------------------------|-----|---------------------------------------------------------------------------------------------------------------------------------------------------------------------------------------------------------------------------|-------------------------------------|--------------------------|------------------------------------------------------|
|                                           |     |                                                                                                                                                                                                                           | Yes                                 | No                       |                                                      |
| <b>Objectives</b>                         | 7   | Provide an explicit statement of the question(s) the review will address with reference to participants, interventions, comparators, and outcomes (PICO)                                                                  | <input checked="" type="checkbox"/> | <input type="checkbox"/> | Introduction                                         |
| <b>METHODS</b>                            |     |                                                                                                                                                                                                                           |                                     |                          |                                                      |
| <b>Eligibility criteria</b>               | 8   | Specify the study characteristics (e.g., PICO, study design, setting, time frame) and report characteristics (e.g., years considered, language, publication status) to be used as criteria for eligibility for the review | <input checked="" type="checkbox"/> | <input type="checkbox"/> | Eligibility                                          |
| <b>Information sources</b>                | 9   | Describe all intended information sources (e.g., electronic databases, contact with study authors, trial registers, or other grey literature sources) with planned dates of coverage                                      | <input checked="" type="checkbox"/> | <input type="checkbox"/> | Search Strategy                                      |
| <b>Search strategy</b>                    | 10  | Present draft of search strategy to be used for at least one electronic database, including planned limits, such that it could be repeated                                                                                | <input checked="" type="checkbox"/> | <input type="checkbox"/> | Supplementary File 2                                 |
| <b>STUDY RECORDS</b>                      |     |                                                                                                                                                                                                                           |                                     |                          |                                                      |
| Data management                           | 11a | Describe the mechanism(s) that will be used to manage records and data throughout the review                                                                                                                              | <input checked="" type="checkbox"/> | <input type="checkbox"/> | Data Extraction                                      |
| Selection process                         | 11b | State the process that will be used for selecting studies (e.g., two independent reviewers) through each phase of the review (i.e., screening, eligibility, and inclusion in meta-analysis)                               | <input checked="" type="checkbox"/> | <input type="checkbox"/> | Selection Processes                                  |
| Data collection process                   | 11c | Describe planned method of extracting data from reports (e.g., piloting forms, done independently, in duplicate), any processes for obtaining and confirming data from investigators                                      | <input checked="" type="checkbox"/> | <input type="checkbox"/> | Data Extraction                                      |
| <b>Data items</b>                         | 12  | List and define all variables for which data will be sought (e.g., PICO items, funding sources), any pre-planned data assumptions and simplifications                                                                     | <input checked="" type="checkbox"/> | <input type="checkbox"/> | Data Extraction                                      |
| <b>Outcomes and prioritization</b>        | 13  | List and define all outcomes for which data will be sought, including prioritization of main and additional outcomes, with rationale                                                                                      | <input checked="" type="checkbox"/> | <input type="checkbox"/> | Inclusion Criteria                                   |
| <b>Risk of bias in individual studies</b> | 14  | Describe anticipated methods for assessing risk of bias of individual studies, including whether this will be done at the outcome or study level, or both; state how this information will be used in data synthesis      | <input checked="" type="checkbox"/> | <input type="checkbox"/> | Quality Appraisal                                    |
| <b>DATA</b>                               |     |                                                                                                                                                                                                                           |                                     |                          |                                                      |
| <b>Synthesis</b>                          | 15a | Describe criteria under which study data will be quantitatively synthesized                                                                                                                                               | <input checked="" type="checkbox"/> | <input type="checkbox"/> | Data synthesis                                       |
|                                           | 15d | If quantitative synthesis is not appropriate, describe the type of summary planned                                                                                                                                        | <input checked="" type="checkbox"/> | <input type="checkbox"/> | Data synthesis                                       |

| Section/topic                            | #  | Checklist item                                                                                                              | Information reported                |                                     | Section where each item is addressed in the protocol |
|------------------------------------------|----|-----------------------------------------------------------------------------------------------------------------------------|-------------------------------------|-------------------------------------|------------------------------------------------------|
|                                          |    |                                                                                                                             | Yes                                 | No                                  |                                                      |
| <b>Meta-bias(es)</b>                     | 16 | Specify any planned assessment of meta-bias(es) (e.g., publication bias across studies, selective reporting within studies) | <input type="checkbox"/>            | <input checked="" type="checkbox"/> | n/a                                                  |
| <b>Confidence in cumulative evidence</b> | 17 | Describe how the strength of the body of evidence will be assessed (e.g., GRADE)                                            | <input checked="" type="checkbox"/> | <input type="checkbox"/>            | Data synthesis                                       |
